1     **Systemic inflammation following long-term successful antiretroviral therapy in**  
2                                     **people living with HIV (PLHIV)**

3

4     Hemalatha Babu<sup>1,2</sup>, Anoop T Ambikan<sup>2</sup>, Erin E Gabriel<sup>3</sup>, Sara Svensson Akusjärvi<sup>2</sup>, Naveen Reddy  
5     Mupanni<sup>2</sup>, Maike Sperk<sup>2</sup>, Narayanaiah Cheedarla<sup>1</sup>, Alangudi Natarajan Palaniapan<sup>6</sup>, Rathinam  
6     Sridhar<sup>4</sup>, Vijila Sundaraj<sup>4</sup>, Srikanth P Tripathy<sup>1</sup>, Piotr Nowak<sup>5</sup>, Luke Elizabeth Hanna<sup>1\*</sup>, Ujjwal  
7     Neogi<sup>2\*</sup>

8

9

10    <sup>1</sup>Department of HIV/AIDS, National Institute for Research in Tuberculosis, ICMR, Chennai, India

11    <sup>2</sup>Division of Clinical Microbiology, Department of Laboratory Medicine, Karolinska Institutet,  
12    Stockholm, Sweden.

13    <sup>3</sup>Department of Medical Epidemiology and Biostatistics and Institute of Environmental Medicine  
14    both of Karolinska Institutet Stockholm, Sweden

15    <sup>4</sup>Government Hospital of Thoracic Medicine, Tambaram Sanatorium, Chennai, India

16    <sup>5</sup>Department of Medicine Huddinge, Unit of Infectious Diseases, Karolinska Institutet, Karolinska  
17    University Hospital, Stockholm, Sweden.

18    <sup>6</sup>Department of Clinic, National Institute for Research in Tuberculosis, ICMR, Chennai, India.

19    **Running Title:** Systemic inflammation following cART

20

21

22    **\*Correspondence:** Ujjwal Neogi, Division of Clinical Microbiology, Department of Laboratory  
23    Medicine, Karolinska Institutet, Stockholm, Sweden, e-mail- [ujjwal.neogi@ki.se](mailto:ujjwal.neogi@ki.se), Phone: +46  
24    852483680

25    Luke Elizabeth Hanna, Department of HIV/AIDS, National Institute for Research in Tuberculosis,  
26    ICMR, Chennai, India, e-mail- [hannatrc@yahoo.com](mailto:hannatrc@yahoo.com)

27 **Abstract:**

28 Long-term HIV infection, even with successful combination antiretroviral therapy (cART), is  
29 associated with an enhanced and accentuated onset of premature-aging or age-related diseases in  
30 people living with HIV (PLHIV). No data are available from low- and middle-income countries  
31 (LMICs) like India on inflamm-aging. In this study, we attempt to understand the  
32 relationship between several ‘biomarkers’ of inflamm-aging in a well-defined Indian cohort of  
33 PLHIV. Blood samples were obtained from therapy naïve PLHIV (Pre-ART, n=43), patients on  
34 cART (ART, n=53) and age and gender-matched healthy controls (HC, n=41) after screening 714  
35 individuals. We measured telomere length, 92 markers of inflammation, immune activation markers,  
36 and HIV-1 reservoir coupled with clinical phenotypes and neurocognitive function assessments  
37 using the International HIV Dementia Scale (IHDS). Despite a median duration of eight years of  
38 cART, sCD14 ( $p < 0.001$ ) and sCD163 ( $p = 0.0377$ ) was not normalized to the level of HC.  
39 Significant differences were observed in 11 inflammatory markers between HC and ART ( $p < 0.05$ ).  
40 Linear regression analysis showed a significant negative association of HIV-1 positive status on  
41 telomere length ( $-2.687$ ,  $p < 0.0001$ ). There was a significant association between HIV status and  
42 higher odds of having  $IHDS \leq 10$  (OR:39.74,  $p < 0.0001$ ). A significant negative association of  
43 CCL20 ( $-0.5236$ ,  $p = 0.0219$ ) and CCL11 ( $-1.1608$ ,  $p = 0.0338$ ) with HIV-1 reservoir was also  
44 observed. In conclusion, our study suggests that PLHIV on successful cART in a standardized  
45 public-health setting, may be at higher risk of inflamm-aging and age-related inflammatory diseases  
46 which may need special intervention and identifies several biomarkers for further mechanistic  
47 investigation.

48

49 **Funding:** The Swedish Research Council and Jeansson's Stiftelser.

50 **Keywords:** Inflamm-aging, HIV-1 reservoir, cART, LMIC

51

52

## 53 **1. Introduction**

54 The most remarkable achievements in the battle against human immunodeficiency viruses (HIV) is  
55 the discovery of efficient, well-tolerated combinational antiretroviral therapy (cART) that has  
56 transformed a deadly viral infection into a chronic, manageable disease. In the absence of cure or  
57 vaccine, long-term HIV infection, even with successful treatment, is associated with an enhanced  
58 and accentuated onset of non-AIDS-related severe pathologies. For some undefined reasons, long-  
59 term treated people living with HIV (PLHIV) not only succumb to death at an earlier age than the  
60 HIV-uninfected counterparts but also suffer from some maladies that are typically associated with  
61 human-aging (1). Premature onset of immunosenescence and HIV-associated inflammation in  
62 patients on cART might be the primary reasons for early aging which has not been reported in  
63 uninfected individuals.

64 Human aging that is characterized by a chronic, low-grade systemic inflammation has been termed  
65 as "inflamm-aging" which is a highly significant risk factor for both morbidity and mortality in  
66 elderly people (2). Such inflammatory environment might trigger the development of age-related  
67 inflammatory diseases (3), such as atherosclerosis (4, 5), cardiovascular diseases (6), type 2  
68 diabetes mellitus (7), Alzheimer disease (8) etc. During cART, HIV persists in a rare population of  
69 long-living, latently infected cells which can contribute to an inflammatory-like state (1).

70 Unlike in high-income countries (HIC), the cART program in low- and middle-income countries  
71 (LMIC) like India, has a public health approach with the standardized regimen for all PLHIV.  
72 Following the launch of National AIDS Control Programme (NACP) in India in 2004, a massive  
73 scale-up of the access to the cART has occurred. As of December 2016, nearly one million PLHIV  
74 were receiving free ART which is 49% of the PLHIV residing in the country (9). The Indian  
75 national first-line ART program recommends the use of one non-nucleoside reverse transcriptase  
76 inhibitor (NNRTI), either nevirapine (NVP) or efavirenz (EFV), in the backbone of two nucleoside  
77 reverse transcriptase inhibitors (NRTI); zidovudine (AZT) or tenofovir (TDF), and lamivudine

78 (3TC) (10). Although the perfect adherence remains a challenge, reasonably good response to the  
79 first line therapy is indicating the overall success of the Indian ART program (11). A recent study  
80 from TREAT Asia HIV Observational Database (TAHOD) including India estimated that older  
81 people with age of 50 years or older would account for 32% of the PLHIV by 2025 (12). Therefore,  
82 by the expansion of effective cART, together with aging PLHIV, the burden of age-related but the  
83 non-AIDS related disease is likely to increase. As the environment can have an enormous impact on  
84 age and age-related diseases, and the genetic determinants of variation of healthy aging may vary  
85 across populations, studies conducted in HIS might not apply to the LMICs (13).

86 To understand the HIV-associated inflammation and immune activation with respect to the  
87 successful long-term cART, our study aimed to assess the relationship between several ‘biomarkers’  
88 of aging and inflammation, including telomere length as an indicator of “biological aging”, host  
89 plasma proteome targeting 92 inflammatory markers and two well-characterized immune activation  
90 markers (sCD14 and sCD163) coupled to clinical phenotypes and neurocognitive function  
91 assessment using the International HIV Dementia Scale (IHDS). Additionally, we also assessed the  
92 association between HIV-1 reservoir, and inflammatory and immune activation markers in these  
93 long-term treated individuals. This study is the first comprehensive study on inflamm-aging in long-  
94 term successfully treated PLHIV which could provide insights into the premature-aging in a  
95 standardized public health setting for monitoring PLHIV on treatment.

## 96 **2. Materials and methods**

### 97 **2.1. Study design and participants**

98 The cohort consists of three groups of individuals: i) PLHIV with successful long-term ART for  
99 more than five years (ART herein), ii) treatment-naïve PLHIV with viremia who were initiating  
100 therapy (Pre-ART herein) and iii) age and gender-matched healthy individuals without any chronic  
101 illness (HC herein). The HIV-positive cohort was recruited from a tertiary care ART Centre,  
102 Government Hospital for Thoracic Medicine (GHTM), Chennai, India, attending routine standard-  
103 of-care.

104 For the ART group, we screened 258 patients who were already on first-line treatment as per  
105 national guidelines for more than five years with two NRTIs and one NNRTI and stable CD4  
106 counts. We used the following inclusion criteria: age between 35 years and 60 years, without any  
107 current co-infections like active tuberculosis or hepatitis C virus (HCV) infection, no comorbidities  
108 like diabetes mellitus, no evidence of cardiovascular diseases or any chronic illness, and adherence  
109 >90% by self-reported adherence and pill count. Finally, 55 patients matched our inclusion criteria  
110 and consented to the study. Samples were also collected from treatment-naïve HIV-infected  
111 individuals with viremia using the following inclusion criteria were used: no active tuberculosis or  
112 diabetes and no illicit drug users (people who inject drugs). After screening 166 patients, 41 gender-  
113 matched individuals were included in the study. Plasma viral load were measured by either *Abbott*  
114 *RealTime HIV-1* assay (Abbott, US) or *COBAS TaqMan 48* version 2.0 (Roche, US). In the ART  
115 group, two patients showed a viral load >150 copies/mL (4000 and 1800 copies/mL respectively)  
116 and were excluded from the study.

117 We screened 295 healthy individuals in and around Chennai, India and finally included 43 HC  
118 using the following inclusion criteria: without any chronic illness, active tuberculosis or HCV  
119 infection, comorbidities like diabetes mellitus, evidence of cardiovascular diseases and no anti-  
120 inflammatory medications for past one month.

121 The overall study design is presented in **Figure 1**. After first-time counseling and obtaining  
122 informed consent to participate in the study, 15 mL of venous blood was collected from the study  
123 subjects.

## 124 **2.2. Assessment of neurocognitive function using International HIV dementia scale (IHDS)**

125 The neurocognitive function test was performed using IHDS (14) in the ART and HC group of  
126 individuals. Study participants were first asked to remember four words (dog, hat, bean, and red) in  
127 the Tamil language (one second per word) which should be recalled at the end of the test. After a  
128 brief introduction of the method, the participants were asked to perform three subtests of the IHDS,  
129 i.e., i) motor speed assessment or a nondominant finger-tapping test, ii) Psychomotor speed

130 assessment or a nondominant Luria hand sequence test, and iii) memory recall test to recall the four  
131 words. Sum of the scores of each subtest was taken as the total score of IHDS for each. Cutoffs of  
132  $\leq 10$  composite IHDS score were indicative of potential risk of cognitive impairment.

### 133 **2.3. Proteomic profiling of the plasma soluble factor**

134 Plasma samples from Pre-ART, ART and HC groups were used for the analysis of the soluble  
135 proteome using Proximity extension assay (PEA) technology (Olink Bioscience AB, Uppsala,  
136 Sweden).<sup>(15)</sup> We selected the Olink<sup>®</sup> Inflammation Panel that includes 92 inflammation-related  
137 protein biomarkers. These biomarkers were also part of several disease areas including cancer  
138 (n=65), cardiovascular diseases (n=47), neurological impairments (n=41), and renal dysfunction  
139 (n=23). We also measured two extensively used biomarkers of immune activation sCD14 (Human  
140 CD14 Quantikine ELISA Kit R&D Systems, UK) and sCD163 (Thermo Scientific<sup>™</sup> Pierce<sup>™</sup>  
141 Human CD163 Kit, Thermo Scientific, USA).

### 142 **2.4. Peripheral blood mononuclear cells' Telomere length**

143 Genomic DNA was extracted from PBMCs using the QIAampDNA Mini Kit (Qiagen,  
144 Germany). The average telomere length was measured using the Absolute Human Telomere Length  
145 Quantification qPCR Assay Kit (AHTLQ; ScienCell Research Laboratories, US) as per  
146 manufacturer's instruction.

### 147 **2.5. Total HIV-1 DNA quantification using IC-qPCR as a marker for HIV-1 reservoir**

148 To quantify total HIV-1 DNA from PBMCs internally controlled qPCR (IC-qPCR) was performed  
149 as described (16). IC-qPCR was performed in duplicates of 500ng DNA using Takara Premix Ex  
150 Taq<sup>™</sup> (Probe qPCR) (Takara, Japan). Primers were used targeting HIV-1 LTR and Beta-globin.  
151 Total HIV-1 DNA copy numbers were calculated based on the linear equations of the 10-fold Beta-  
152 globin standard curve derived from Jurkat cells and the 10-fold pNL4-3 plasmid standard curve,  
153 diluted in 50 ng/ $\mu$ L of Jurkat DNA to mimic clinical samples and normalized to obtain HIV-1 DNA  
154 copies per million PBMCs.

## 155 **2.6. Statistical analysis and data visualization**

156 The Mann Whitney U test, Chi-square test, and one-way analysis of variance (ANOVA) were  
157 performed to identify differences in means of protein expression values (NPx) of different groups in  
158 the cohort under study. Pair-wise comparison between means of each group was also carried out. A  
159 post hoc test using Tukey Honest Significant Differences (TukeyHSD) method was executed to  
160 obtain the pair-wise ANOVA results. Linear and logistic univariate and multivariate regression  
161 were used with the outcomes of telomere length and IHDS $\leq$ 10, respectively, to investigate the  
162 association of HIV-status and HIV-treatment duration and these markers of cellular aging. This  
163 analysis was performed in R. We did not correct for multiple comparisons. A heatmap was  
164 generated to visualize the clustering of samples based on protein expression using gplotsv3.0.1  
165 packages in R. The similarities between each sample in the cohort concerning protein expression  
166 was also visualized in a multi-dimensional scaling plot (MDS) using the R package edgeR.

## 167 **2.7. Ethical Clearances**

168 The study was approved by the Institutional Ethics Committee of the National Institute for Research  
169 in Tuberculosis (NIRT IEC No: 2015023 and TRC IEC No: 2011001) and Institutional Review  
170 Board Committee of Government Hospital for Thoracic Medicine (GHTM-27102015). All the  
171 study participants gave written informed consent. Patient identities were anonymized and delinked  
172 before analysis.

## 173 **3. Results**

### 174 **3.1. Patients' clinical characteristics**

175 The cohort characteristics are presented in **Table 1**. All the three cohorts are gender matched. At  
176 sampling, there was no difference in median age between ART and HC groups (45 vs. 46 years) but  
177 relatively lower age in the Pre-ART group. In the ART group, the median (IQR) duration of  
178 treatment was 8 years (6-10 years). Among the ART patients 57% (30/53) were on zidovudine,  
179 lamivudine, and nevirapine (ZDV/3TC/NVP) and remained 43% (23/53) were on tenofovir,

180 lamivudine, and efavirenz (TDF/3TC/EFV). All the ART group patients-initiated treatment in the  
181 chronic phase of infection with median (IQR) CD4 count of 186 (100-280) cells/ $\mu$ L.

182

183

### 184 **3.2. Soluble monocyte activation markers in Pre-ART, ART and HC**

185 We tested the plasma monocyte activation markers sCD14 and sCD163 in the three groups. As  
186 expected, Pre-ART group has higher sCD14 (**Figure 2a**) and sCD163 (**Figure 2b**) plasma levels  
187 compared to HC ( $p < 0.0001$ , Mann Whitney U Test). Interestingly despite a median duration of  
188 eight years of cART, there is no statistically significant difference between Pre-ART and ART  
189 group in sCD14. The median level of sCD163 was lower in ART compared to Pre-ART group  
190 (30014 pg/mL vs. 68192 pg/mL,  $p < 0.0001$ , Mann Whitney U Test) but not normalized to the level  
191 of HC ( $p = 0.0377$ , Mann Whitney U Test). Additionally, we did not find any significant correlation  
192 between duration of cART and sCD14 (Spearman  $r$ : 0.163;  $p = 0.2432$ ) and sCD163 (Spearman  $r$ :  
193 0.154;  $p = 0.2720$ ) levels in plasma.

### 194 **3.3. Soluble plasma inflammation markers in Pre-ART, ART and HC**

195 We have also tested 92 plasma inflammation markers in the three groups. Among the 92 proteins,  
196 75 were detectable in  $>50\%$  of the samples and were used for the analysis. Among the samples  
197 tested two Pre-ART and one HC sample did not pass the quality control, thus, they were excluded  
198 from the analysis. The hierarchical clustering analysis (HCA) with false discovery rate (FDR)  
199  $< 0.001$  identified clustering of 79% (31/39) of Pre-ART samples together separately along with two  
200 samples from HC and one from ART group (**Figure 3a**). Another seven Pre-ART samples also  
201 clustered together but within the HC and ART group of samples. Some of the ART and HC  
202 clustered separately from Pre-ART but intermingled with each other. HCA result is consistent with  
203 the MDS plot (**Supplementary Fig 1**) and principal component analysis. Among the 75 proteins,  
204 41 had a different level of achieved statistical significance ( $p < 0.05$ , TurkeyHSD) at least in on the



205 comparisons (ART vs Pre-ART, Pre-ART vs HC and HC vs ART) (**Figure 3b**). As expected there  
206 were several inflammatory markers with a statistically significant differential protein level between  
207 Pre-ART and ART (n=38) and Pre-ART and HC (n=29). There were 11 significantly different  
208 proteins between HC and ART with uniquegroup-specific4E-BP1 in the comparison. Five proteins  
209 differentiate among the three groups (CD8A, TRANCE, CD5, SLAMF1, and CCL23) (**Figure 3b**).  
210 The level of soluble CD8A, 4E-BP1, SLAMF1 and CCL23 in ART group of individuals did not  
211 normalized to the level of HC (**Figure 3c**). The level of soluble plasma TRAIL, NT-3, CD5 and  
212 TRANCE went down significantly in ART group compared to the HC and Pre-ART groups of  
213 individuals. While the level of ADA, MMP-1 and CST-5 gone up significantly in ART group  
214 compared to the HC and Pre-ART groups of individuals (**Figure 3c**). The complete comparison was  
215 given as supplementary Table 1.

#### 216 **3.4. Association of telomere length with HIV- status and inflammation markers**

217 Telomere length analysis was performed only in two groups (HC and ART), as PBMCs were not  
218 available for the Pre-ART group. ART group had statically significant shorter telomere length than  
219 chronological age-matched HC (Median (IQR): 1.89 (0.95 – 3.78) vs. 5.151(3.207- 6.765),  
220  $p < 0.001$ ). Linear regression analysis, after adjusting for chronological age shows a significant  
221 negative association of HIV-1 positive status on telomere length (-2.6870, 95%CI -4.0188,-1.7152,  
222  $p < 0.0001$ ). In the ART group alone, there was not a statistically significant association between  
223 duration of treatment and telomere length after adjusting for age alone or additionally adjusting for  
224 markers of disease progression. We investigated biomarkers as mediators of the relationship  
225 between HIV status and telomere length as we saw there was a strong association between HIV  
226 status and reduced telomere length. After adjustment for HIV-1 status, age, years of treatment and  
227 one of each of the inflammatory biomarkers, in HC and ART group, there was not strong evidence  
228 to support any of the biomarkers as mediators of the relationship between HIV status and telomere  
229 length with or without adjustment for treatment duration. In the ART group alone, after adjusting  
230 for age, gender, duration of treatment, HIV-1 reservoir, CD4 count at initiation, CD8/CD4 ratio and

231 sCD14, we observed CXCL1 and TGF- $\alpha$  to have a significant association with increased telomere  
232 length (0.2905, 95%CI: 0.0029,0.5780 p=0.0479) and (0.7865, 95%CI:0.1003,1.4727, p=0.0262),  
233 respectively. We also found that IL-10RA was significantly associated with decreased telomere  
234 length (-1.7901, 95%CI: -3.5133, -0.0667 p=0.0423).

235

### 236 **3.5. Cognitive impairment with HIV status and inflammation markers**

237 There was a significant association of HIV status and higher odds of having a potential cognitive  
238 impairment (IHDS $\leq$ 10) (OR: 39.7404, 95%CI: 9.9156, 272.4432, p<0.0001) when adjusted only for  
239 age and additionally adjusting for the duration of treatment further increased the estimated odds of  
240 cognitive impairment for HIV-1 status. Among the ART group of individuals, 75% (40/53) had  
241 IHDS $\leq$ 10 while in HC it was only 2% (2/29), indicating compromised cognitive function.  
242 However, in the ART group, there was not a significant association between duration of treatment  
243 and odds of IHDS $\leq$ 10 with or without adjustment for markers of disease progression including  
244 HIV-1 reservoir, CD4 at treatment initiation, CD4 and CD8 ratio and sCD163 which earlier  
245 reported as plasma biomarkers of neurocognitive impairment.

### 246 **3.6. HIV-1 reservoir and soluble plasma biomarkers**

247 The median (IQR) total pro-viral DNA count in the ART group was 2.870 (2.631-3.156) log<sub>10</sub>  
248 copies/mL. The HIV-1 reservoir is significantly negatively associated with the duration of treatment  
249 by univariate linear regression (-0.1898, 95%CI:-0.3370, -0.0425; p=0.0128). However, after  
250 adjusting for CD4 at treatment initiation, CD4 at sampling, CD4:CD8 ratio at sampling as well as  
251 treatment regimen, no significant association was observed (-0.155, 95%CI: -0.3396,0.0296  
252 p=0.0968). Upon further investigation the relationship between inflammatory biomarkers and the  
253 HIV-1 reservoir, we found a significant negative association of CCL20 (-0.5236, 95%CI:-0.9657, -  
254 0.0815, p=0.0219) and CCL11 (-1.1608, 95%CI:-2.2265, -0.0951, p=0.0338) with HIV-1 reservoir

255 after adjusting for age, gender, duration of treatment, CD4 at treatment initiation, CD4 and CD8  
256 ratio and sCD14.

### 257 **3.7. Treatment regimen and biomarkers**

258 As there were two sub-groups within the ART group: those on TDF/3TC/EFV (n=23) and those on  
259 ZDV/3TC/NVP (n=30), we, therefore, investigated the potential impact of the treatment regimen on  
260 the level of inflammatory markers between the two groups in comparison with HC (**Figure 4**).  
261 There are 25 plasma inflammatory markers that were significantly different between any of the two  
262 comparative analysis i.e. HC vs ZDV/3TC/NVP (n=14,  $p < 0.05$ , Mann Whitney U test), HC vs  
263 TDF/3TC/EFV (n=13,  $p < 0.05$ , Mann Whitney U test) and ZDV/3TC/NVP vs TDF/3TC/EFV  
264 (n=11,  $p < 0.05$ , Mann Whitney U test). In ZDV/3TC/NVP vs. TDF/3TC/EFV comparison, three  
265 unique proteins were significantly different (IL-10RB, TWEAK, and CSF-1) (**Figure 4**).

## 266 **4. Discussion**

267 In this study that examined a cohort of PLHIV on long-term successful cART from India, we found  
268 that despite a median duration of eight years of cART, no difference in median levels of the soluble  
269 monocyte activation marker sCD14 between the Pre-ART and ART group. However, the median  
270 level of sCD163, was significantly lower in the ART group than in the Pre-ART group, although  
271 the level was not normalized to that of the healthy control group. Several soluble inflammatory  
272 markers were also not normalized to the levels seen in healthy controls, indicating systemic  
273 inflammation in PLHIV and patients receiving a ZDV/3TC/NVP have higher residual inflammation  
274 than PLHIV's on TDF/3TC/EFV regimen. These data suggests that patients on successful cART  
275 were clearly at higher risk of age-related inflammatory diseases leading to inflamm-aging.

276 sCD14 is a marker of monocyte activation in response to a microbial product like  
277 lipopolysaccharide (LPS), thus also called a marker of microbial translocation. A study in the US  
278 population showed that sCD14 is an independent predictor of mortality in HIV infection (17).  
279 Contrasting results have been reported from different studies on the effect of cART on sCD14.

280 Several studies reported that sCD14 did not decline following short-term (18) or long-term cART  
281 (19, 20) while others reported decline (21-23). Our study is in line with former studies that we did  
282 not find any difference between PreART group and patients with median eight years of cART. A  
283 high burden of diarrhoeal diseases, coupled with compromised water quality, poor sanitation, and  
284 handwashing (24), PLHIV are at greater risk of elevated microbial translocation which could be one  
285 of the reasons for increased monocyte activation by a microbial product that was not restored  
286 following cART.

287 sCD163 is thought to be a more precise monocyte/macrophage activation markers (25), which is  
288 also shown be associated with all-cause mortality in HIV-infected individuals (26). In our study, we  
289 observed a significant decrease in the level of sCD163 between PreART and ART groups, but the  
290 levels were not normalized to that seen in the healthy state even with successful cART. As sCD163  
291 is a cause of vascular inflammation leading to cardiovascular disease (27) and neurocognitive  
292 impairment in HIV-1 infected individuals (28), non-normalization of sCD163 at healthy state  
293 increase the chance of both age-associated cardiovascular as well as neurocognitive disease in those  
294 individuals.

295 The age-related inflammatory diseases are more common in PLHIV than in the general population  
296 (29). In our study, we observed several plasma inflammatory biomarkers like CD8A, 4E-BP1,  
297 SLAMF1 and CCL23 were not normalized to the level of healthy controls which were earlier  
298 associated with age-related diseases. Out of the several plasma proteins tested, TRANCE, NT-3,  
299 CD5 and TRAIL were significantly lower level in ART group compare to healthy controls, while  
300 CCL23, CST5, CD8A, MMP-1, 4E-BP1, ADA and SLAMF1 were significantly higher in ART  
301 group. TRANCE/RANKL produced by osteoblast and other cells including T cells. Patients treated  
302 with NRTIs and NNRTIs shows decrease in circulating RANKL (30) which is similar to our data.  
303 The low level of TRANCE was shown to be an independent predictor of nontraumatic-fracture  
304 affecting osteoclastogenesis (31). Previous study reported elevated level of sTRAIL in treatment  
305 naïve PLHIV and decrease following short term cART initiation (32), our study showed that long-

306 term ART in our cohort did not normalized the TRAIL level to healthy status. Therefore, prolonged  
307 HIV-1 infection and cART has influenced the normalization of sTRAIL because of immunological  
308 dysfunction by both persistent HIV-1 infection and treatment effect. In an earlier study from our  
309 group in Swedish patients with two decade long successful therapy showed normalization of sCD5  
310 to a healthy state (33), which is not true in the Indian cohort with median eight years of successful  
311 treatment. The decrease NT-3 level in cerebrospinal fluid showed strong co-relation with the  
312 severity of neurocognitive impairment in PLHIV (34). In our cohort NT-3 level was significantly  
313 decreased in ART compared to the healthy control which is correlated with the lower IHDS score in  
314 these population. Cystatin D (CST5) is not well studied in the context of HIV, however study  
315 showed that higher level of serum CST5 along with the TRAIL are biomarkers in traumatic brain  
316 injury patients which indicates of neuronal damage in ART patients as the level is higher compared  
317 to healthy individuals. Serum soluble CD8 is proposed to be a marker of CD8 T-cell activation in  
318 HIV-1 infection (35). Higher plasma level of sCD8A in our ART group compare to healthy controls  
319 indicates there is still persistent infection which could be linked to the higher reservoir. Increased  
320 plasma CCL23 level was associated with coronary atherosclerosis (36) suggest that patients in long  
321 term ART treatment with higher plasma CCL23 level compare to healthy group has higher risk of  
322 developing vascular diseases. HIV-1 hyperactivates mTOR complex1 (mTORC1) for its own viral  
323 production and latency reactivation (37). However no study reported any relation of treatment and  
324 plasma 4E-BP1. Higher level of 4E-BP1 in plasma in ART patients compare to healthy and its  
325 correlation with HIV-1 associated mTOR pathway mechanism in viral production has to be  
326 elucidated in long-term ART suppressive condition.

327 Moreover, in our sub-group analysis of the treated HIV group, we found several significant  
328 associations all of which revealed higher inflammatory markers levels in patients treated with  
329 ZDV/3TC/NVP, than in those treated with TDF/3TC/EFV. The virological efficacy studies  
330 indicated that TDF/3TC/EFV is equal or superior to other regiments.(38, 39)Studies have shown  
331 that the NRTIs like ZDV and 3TC, can cause accelerated aging by depletion of mitochondrial DNA

332 via inhibition of the mitochondrial specific DNA polymerase- $\gamma$  (40, 41). Use of NVP also showed  
333 neurocognitive impairment (42). Therefore we propose to use TDF/3TC/EFV as a first-line regimen  
334 that might avoid accelerated the aging process in PLHIV partly.

335 In our study, we observed a strong association between higher odds of having a potential cognitive  
336 impairment with HIV-1 positive status. The IHDS (14) was adapted from the HIV Dementia Scale  
337 (HDS)(43) mainly for a non-English speaking population, and it was earlier used for the Indian  
338 population (44). It was observed 35% of the treatment naïve Indian patients have IHDS<10 (44).  
339 Following the use of cART, the severe form of HAND have declined, but the prevalence of a milder  
340 form of the HAND is continuously stable or has even increased (45, 46). Despite the earlier studies  
341 showing that HIV-1 subtype C circulating in India (HIV-1C<sub>IN</sub>) has a lower magnitude of  
342 neurovirulence (47-49), a substantial proportion (75%) of the patients who initiated treatment at the  
343 chronic stage of infection with very low CD4 count had cognitive impairment (50). Based on the  
344 findings we postulated that though HIV-1C<sub>IN</sub> circulated in India has lower neurovirulence than  
345 HIV-1B or HIV-1C circulating in Africa, late initiation of the therapy could potentially be the cause  
346 of impaired cognitive function which cART fails to restore.

347 Chronic inflammation and immune activation during cART are proposed to be important  
348 parameters contributing to HIV persistence (51, 52). However, a recent study showed that the  
349 markers of immune activation (sCD14 and sCD163) and inflammation (hsCRP and IL-6) were not  
350 associated with the level of a persistent HIV-1 reservoir following median seven years of treatment  
351 (20). Our study is in line with this previous study as we found no co-relation of sCD14 and sCD163  
352 plasma levels with HIV-1 reservoir size. After adjusting several parameters including age and CD4  
353 count at initiation of therapy, several inflammatory markers including IL-6 did not correlate with  
354 the HIV-1 reservoir either. As our inflammatory markers panel was larger than any other earlier  
355 studies reported, we observed that the two chemokines eotaxin-1 (CCL11) and CCL20 (also known  
356 as Macrophage Inflammatory Protein-3 [MIP-3]) were negatively associated with the HIV-1  
357 reservoir.

358 Eotaxin-1 and its seven-transmembrane G protein-coupled receptor (GPCR) CCR3 have been shown  
359 to modulate the HIV-1 entry of dual-tropic and some macrophage (M)-tropic strains (53) and  
360 eotaxin can inhibit the efficiency of this process also in microglia (54-56). CCR6 and its ligand  
361 CCL20 (CCR6/CCL20 axis) may be involved in HIV pathogenesis and immunity (57). CCR6 and  
362 its isoform CKR-L3 that mainly found on dendritic cells (DCs), memory T cells and selected B  
363 cell subtypes also act as a co-receptor for certain HIV-1 isolates (58, 59). Another study also  
364 showed that HIV-1 latency could be established in resting CD4<sup>+</sup> T cells infected with HIV-1 after  
365 exposure of CCL20 (60) and CCR6 is a marker for memory CD4<sup>+</sup> T cells that harbor the highest  
366 levels of HIV-1 proviral DNA in infected individuals (61). CCL20 has also been shown to be an  
367 anti-HIV-1 microbicide in the female genital tract (62). We observed a negative association of both  
368 CCL11 and CCL20 with the total HIV-1 reservoir with longer duration of successful therapy.  
369 Several studies suggested that cytokines may play an important role in the seeding of the latent  
370 reservoir in the acute HIV-1 infection as well as they can promote long-term viral persistence  
371 during suppressive cART (reviewed in (63)). Based on all these findings we, therefore, hypothesize  
372 that cytokine receptors that can regulate the HIV-1 entry into the cells (like CCR3/CCL11 axis) and  
373 cell surface receptor ligands which have anti-HIV-1 activities, like CCR6/CCL20 axis, are key  
374 modulators for the HIV-1 persistence during suppressive cART. Understanding the molecular  
375 mechanism of those cytokine signaling pathways responsible for HIV-1 entry, anti-HIV-1 activity  
376 and latency may provide attracting candidates for therapeutic strategies for remission or reduction  
377 of the viral reservoir during suppressive cART.

378 Our study has some limitations that merit comments. First, the patient population that was selected  
379 for this study are among the best pool of successfully treated individuals' through the Indian National  
380 ART program. The findings may not generalize to the general population of treated individuals.  
381 Second, due to lack of earlier studies in the settings, the design of our study, and sample size  
382 limitations, the conclusions that can be drawn are limited to associations with modest significance.  
383 Also, a large number of tests were run, and the most significant results are highlighted, for this



384 reason, the results should be considered hypothesis generating. Third, the patients were not  
385 monitored virologically as a standard of care, and we have only virological data at the time of  
386 sampling. Any potential viral blips may confound the inflammatory markers. Finally, the reservoir  
387 quantification was done with total HIV-1 DNA, not the replication HIV-1 reservoir. However, our  
388 study is the first comprehensive study on inflamm-aging in the long term successfully treated  
389 PLHIV from an LMICs which uses a standardized public health approach for monitoring PLHIV on  
390 treatment.

391 In conclusion, for the first time in a standardized public health setting for monitoring PLHIV on  
392 treatment from an LMIC, we identified several inflammatory soluble markers in long-term  
393 successfully treated individuals that are not normalized to the levels seen in healthy individuals.  
394 These findings imply that in spite of successful ART, PLHIVs are potentially at higher risk of  
395 inflamm-aging and age-related inflammatory diseases. Therefore use of anti-inflammatory drugs  
396 may potentially be considered in this population which can reduce the burden of excessive immune  
397 activation and inflammation (64). The effect was greater in those on a ZDV/3TC/NVP treatment  
398 regimen than in those receiving TDF/3TC/EFV. HIV-1 persistence did not correlate largely with  
399 immune activation or inflammatory markers. Some markers like CCL11 and CCL20, which play a  
400 role in regulating HIV-1 entry and have potent anti-HIV activity, could be a key for the design of  
401 therapeutic strategies for reduction of the viral reservoir during suppressive cART. However, their  
402 precise mechanisms of interactions need to be first investigated.

#### 403 **Funding sources**

404 This work was supported by grants from the Swedish Research Council Establishment Grant (2017-  
405 01330) (U.N.) and Jeansson's Stiftelser (JS2016-0185)(U.N.).

#### 406 **Acknowledgments**

407 H.B. acknowledge support from the HIV Research Trust, UK supported in part by ViiV Healthcare,  
408 and Council of Scientific and Industrial Research (CSIR), India. H.B. is a Ph.D. candidate at Madras  
409 University. This work is submitted in partial fulfillment of the requirement for the Ph.D. Authors



410 would like to thank technical support received from Ms. Gomathi, Mr. Kannan Muthuramalingam,  
411 and Mr. Sathya Murthi.

#### 412 **Conflict-of-interest disclosure**

413 The authors declare no competing financial interests

414 **Contribution:** H.B., S.S.A, N.R.M, M.S., N.C. performed the laboratory experiments; H.B.  
415 performed the IHDS assessment; A.T.A. and E.E.G. performed bioinformatics and statistical  
416 analysis; U.N. and A.T.A. made the figures. N.P., R.S., V.J., and S.K.T. recruited study subjects  
417 and provided the clinical data. P.N. provided the clinical interpretation. U.N. and L.E.H conceived  
418 and designed the study; U.N. wrote the first draft of the paper reviewed by H.B., M.S., P.N, L.E.H.  
419 All the authors approved the final version of the manuscript.

420

#### 421 **References:**

- 422 1. Deeks, S. G. 2011. HIV infection, inflammation, immunosenescence, and aging. *Annu Rev*  
423 *Med* 62: 141-155.
- 424 2. Franceschi, C., M. Bonafe, S. Valensin, F. Olivieri, M. De Luca, E. Ottaviani, and G. De  
425 Benedictis. 2000. Inflamm-aging. An evolutionary perspective on immunosenescence. *Ann*  
426 *N Y Acad Sci* 908: 244-254.
- 427 3. Cevenini, E., D. Monti, and C. Franceschi. 2013. Inflamm-ageing. *Curr Opin Clin Nutr*  
428 *Metab Care* 16: 14-20.
- 429 4. Merino, A., P. Buendia, A. Martin-Malo, P. Aljama, R. Ramirez, and J. Carracedo. 2011.  
430 Senescent CD14+CD16+ monocytes exhibit proinflammatory and proatherosclerotic  
431 activity. *J Immunol* 186: 1809-1815.
- 432 5. Seidler, S., H. W. Zimmermann, M. Bartneck, C. Trautwein, and F. Tacke. 2010. Age-  
433 dependent alterations of monocyte subsets and monocyte-related chemokine pathways in  
434 healthy adults. *BMC Immunol* 11: 30.
- 435 6. Rauchhaus, M., W. Doehner, D. P. Francis, C. Davos, M. Kemp, C. Liebenthal, J. Niebauer,  
436 J. Hooper, H. D. Volk, A. J. Coats, and S. D. Anker. 2000. Plasma cytokine parameters and  
437 mortality in patients with chronic heart failure. *Circulation* 102: 3060-3067.
- 438 7. Spranger, J., A. Kroke, M. Mohlig, K. Hoffmann, M. M. Bergmann, M. Ristow, H. Boeing,  
439 and A. F. Pfeiffer. 2003. Inflammatory cytokines and the risk to develop type 2 diabetes:  
440 results of the prospective population-based European Prospective Investigation into Cancer  
441 and Nutrition (EPIC)-Potsdam Study. *Diabetes* 52: 812-817.
- 442 8. Wyss-Coray, T., and J. Rogers. 2012. Inflammation in Alzheimer disease-a brief review of  
443 the basic science and clinical literature. *Cold Spring Harb Perspect Med* 2: a006346.
- 444 9. UNAIDS. 2016. Country Report: India.
- 445 10. Antiretroviral therapy guidelines for HIV-infected adults and adolescents: May 2013. N. A.  
446 C. O. Department of AIDS Control, Ministry of Health and Family welfare, Government of  
447 India, ed, New Delhi.

- 448 11. Neogi, U., E. Heylen, A. Shet, S. Chandy, R. Shamsunder, A. Sonnerborg, and M. L.  
449 Ekstrand. 2013. Long-term efficacy of first line antiretroviral therapy in Indian HIV-1  
450 infected patients: a longitudinal cohort study. *PLoS One* 8: e55421.
- 451 12. Puh, R., N. Kumarasamy, P. S. Ly, O. T. Ng, K. Van Nguyen, T. P. Merati, T. T. Pham, M.  
452 P. Lee, J. Y. Choi, J. L. Ross, and M. G. Law. 2017. HIV and Aging: Demographic Change  
453 in the Asia-Pacific Region. *J Acquir Immune Defic Syndr* 74: e146-e148.
- 454 13. Hoffman, J. M., Y. Lyu, S. D. Pletcher, and D. E. L. Promislow. 2017. Proteomics and  
455 metabolomics in ageing research: from biomarkers to systems biology. *Essays Biochem* 61:  
456 379-388.
- 457 14. Sacktor, N. C., M. Wong, N. Nakasujja, R. L. Skolasky, O. A. Selnes, S. Musisi, K.  
458 Robertson, J. C. McArthur, A. Ronald, and E. Katabira. 2005. The International HIV  
459 Dementia Scale: a new rapid screening test for HIV dementia. *Aids* 19: 1367-1374.
- 460 15. Assarsson, E., M. Lundberg, G. Holmquist, J. Bjorkestén, S. B. Thorsen, D. Ekman, A.  
461 Eriksson, E. Rennel Dickens, S. Ohlsson, G. Edfeldt, A. C. Andersson, P. Lindstedt, J.  
462 Stenvang, M. Gullberg, and S. Fredriksson. 2014. Homogenous 96-plex PEA immunoassay  
463 exhibiting high sensitivity, specificity, and excellent scalability. *PLoS One* 9: e95192.
- 464 16. Vicenti, I., G. Meini, F. Saladini, A. Giannini, A. Boccuto, E. Schiaroli, and M. Zazzi. 2018.  
465 Development of an internally controlled quantitative PCR to measure total cell-associated  
466 HIV-1 DNA in blood. *Clin Chem Lab Med* 56: e75-e77.
- 467 17. Sandler, N. G., H. Wand, A. Roque, M. Law, M. C. Nason, D. E. Nixon, C. Pedersen, K.  
468 Ruxrungtham, S. R. Lewin, S. Emery, J. D. Neaton, J. M. Brenchley, S. G. Deeks, I. Sereti,  
469 and D. C. Douek. 2011. Plasma levels of soluble CD14 independently predict mortality in  
470 HIV infection. *J Infect Dis* 203: 780-790.
- 471 18. Hattab, S., M. Guiguet, G. Carcelain, S. Fourati, A. Guihot, B. Autran, F. Caby, A. G.  
472 Marcelin, D. Costagliola, and C. Katlama. 2015. Soluble biomarkers of immune activation  
473 and inflammation in HIV infection: impact of 2 years of effective first-line combination  
474 antiretroviral therapy. *HIV Med* 16: 553-562.
- 475 19. van den Dries, L., M. A. A. Claassen, Z. M. A. Groothuisink, E. van Gorp, and A.  
476 Boonstra. 2017. Immune activation in prolonged cART-suppressed HIV patients is  
477 comparable to that of healthy controls. *Virology* 509: 133-139.
- 478 20. Gandhi, R. T., D. K. McMahon, R. J. Bosch, C. M. Lalama, J. C. Cyktor, B. J. Macatangay,  
479 C. R. Rinaldo, S. A. Riddler, E. Hogg, C. Godfrey, A. C. Collier, J. J. Eron, and J. W.  
480 Mellors. 2017. Levels of HIV-1 persistence on antiretroviral therapy are not associated with  
481 markers of inflammation or activation. *PLoS Pathog* 13: e1006285.
- 482 21. Wallet, M. A., C. A. Rodriguez, L. Yin, S. Saporta, S. Chinratanapisit, W. Hou, J. W.  
483 Sleasman, and M. M. Goodenow. 2010. Microbial translocation induces persistent  
484 macrophage activation unrelated to HIV-1 levels or T-cell activation following therapy. *Aids*  
485 24: 1281-1290.
- 486 22. Taiwo, B., R. M. Matining, L. Zheng, M. M. Lederman, C. R. Rinaldo, P. S. Kim, B. I.  
487 Berzins, D. R. Kuritzkes, A. Jennings, J. J. Eron, Jr., and C. C. Wilson. 2013. Associations  
488 of T cell activation and inflammatory biomarkers with virological response to  
489 darunavir/ritonavir plus raltegravir therapy. *J Antimicrob Chemother* 68: 1857-1861.
- 490 23. Rajasuriar, R., D. Booth, A. Solomon, K. Chua, T. Spelman, M. Gouillou, T. E. Schlub, M.  
491 Davenport, S. Crowe, J. Elliott, J. Hoy, C. Fairley, G. Stewart, P. Cameron, and S. R.  
492 Lewin. 2010. Biological determinants of immune reconstitution in HIV-infected patients  
493 receiving antiretroviral therapy: the role of interleukin 7 and interleukin 7 receptor alpha and  
494 microbial translocation. *J Infect Dis* 202: 1254-1264.
- 495 24. Dandona, L., R. Dandona, G. A. Kumar, D. K. Shukla, V. K. Paul, K. Balakrishnan,  
496 Prabhakaran, D. N. Tandon, S. Salvi, A. P. Dash, I. S.-L. D. B. I. Collaborators., and S.  
497 Swaminathan. 2017. Nations within a nation: variations in epidemiological transition across  
498 the states of India, 1990-2016 in the Global Burden of Disease Study. *Lancet* 390: 2437-  
499 2460.

- 500 25. Hunt, P. W. 2016. Soluble CD163 and Clinical Outcomes in Treated HIV Infection: Insights  
501 Into Mechanisms. *J Infect Dis* 214: 1132-1133.
- 502 26. Knudsen, T. B., G. Ertner, J. Petersen, H. J. Moller, S. K. Moestrup, J. Eugen-Olsen, G.  
503 Kronborg, and T. Benfield. 2016. Plasma Soluble CD163 Level Independently Predicts All-  
504 Cause Mortality in HIV-1-Infected Individuals. *J Infect Dis* 214: 1198-1204.
- 505 27. Subramanian, S., A. Tawakol, T. H. Burdo, S. Abbara, J. Wei, J. Vijayakumar, E. Corsini,  
506 A. Abdelbaky, M. V. Zanni, U. Hoffmann, K. C. Williams, J. Lo, and S. K. Grinspoon.  
507 2012. Arterial inflammation in patients with HIV. *Jama* 308: 379-386.
- 508 28. Burdo, T. H., A. Weiffenbach, S. P. Woods, S. Letendre, R. J. Ellis, and K. C. Williams.  
509 2013. Elevated sCD163 in plasma but not cerebrospinal fluid is a marker of neurocognitive  
510 impairment in HIV infection. *Aids* 27: 1387-1395.
- 511 29. Guaraldi, G., G. Orlando, S. Zona, M. Menozzi, F. Carli, E. Garlassi, A. Berti, E. Rossi, A.  
512 Roverato, and F. Palella. 2011. Premature age-related comorbidities among HIV-infected  
513 persons compared with the general population. *Clin Infect Dis* 53: 1120-1126.
- 514 30. Mora, S., I. Zamproni, L. Cafarelli, V. Giacomet, P. Erba, G. Zuccotti, and A. Vigano. 2007.  
515 Alterations in circulating osteoimmune factors may be responsible for high bone resorption  
516 rate in HIV-infected children and adolescents. *Aids* 21: 1129-1135.
- 517 31. Schett, G., S. Kiechl, K. Redlich, F. Oberhollenzer, S. Weger, G. Egger, A. Mayr, J. Jocher,  
518 Q. Xu, P. Pietschmann, S. Teitelbaum, J. Smolen, and J. Willeit. 2004. Soluble RANKL and  
519 risk of nontraumatic fracture. *Jama* 291: 1108-1113.
- 520 32. Herbeval, J. P., A. Boasso, J. C. Grivel, A. W. Hardy, S. A. Anderson, M. J. Dolan, C.  
521 Chougnet, J. D. Lifson, and G. M. Shearer. 2005. TNF-related apoptosis-inducing ligand  
522 (TRAIL) in HIV-1-infected patients and its in vitro production by antigen-presenting cells.  
523 *Blood* 105: 2458-2464.
- 524 33. Sperk, M., W. Zhang, P. Nowak, and U. Neogi. 2018. Plasma soluble factor following two  
525 decades prolonged suppressive antiretroviral therapy in HIV-1-positive males: A cross-  
526 sectional study. *Medicine (Baltimore)* 97: e9759.
- 527 34. Meeker, R. B., W. Poulton, S. Markovic-Plese, C. Hall, and K. Robertson. 2011. Protein  
528 changes in CSF of HIV-infected patients: evidence for loss of neuroprotection. *J Neurovirol*  
529 17: 258-273.
- 530 35. Nishanian, P., B. Hofmann, Y. Wang, A. L. Jackson, R. Detels, and J. L. Fahey. 1991.  
531 Serum soluble CD8 molecule is a marker of CD8 T-cell activation in HIV-1 disease. *AIDS*  
532 5: 805-812.
- 533 36. Castillo, L., A. Rohatgi, C. R. Ayers, A. W. Owens, S. R. Das, A. Khera, D. K. McGuire,  
534 and J. A. de Lemos. 2010. Associations of four circulating chemokines with multiple  
535 atherosclerosis phenotypes in a large population-based sample: results from the dallas heart  
536 study. *J Interferon Cytokine Res* 30: 339-347.
- 537 37. Kumar, B., S. Arora, S. Ahmed, and A. C. Banerjea. 2017. Hyperactivation of mammalian  
538 target of rapamycin complex 1 by HIV-1 is necessary for virion production and latent viral  
539 reactivation. *Faseb j* 31: 180-191.
- 540 38. Tang, M. W., P. J. Kanki, and R. W. Shafer. 2012. A review of the virological efficacy of  
541 the 4 World Health Organization-recommended tenofovir-containing regimens for initial  
542 HIV therapy. *Clin Infect Dis* 54: 862-875.
- 543 39. Campbell, T. B., L. M. Smeaton, N. Kumarasamy, T. Flanigan, K. L. Klingman, C.  
544 Firnhaber, B. Grinsztejn, M. C. Hosseinipour, J. Kumwenda, U. Lalloo, C. Riviere, J.  
545 Sanchez, M. Melo, K. Supparatpinyo, S. Tripathy, A. I. Martinez, A. Nair, A. Walawander,  
546 L. Moran, Y. Chen, W. Snowden, J. F. Rooney, J. Uy, R. T. Schooley, V. De Gruttola, and  
547 J. G. Hakim. 2012. Efficacy and safety of three antiretroviral regimens for initial treatment  
548 of HIV-1: a randomized clinical trial in diverse multinational settings. *PLoS Med* 9:  
549 e1001290.

- 550 40. Payne, B. A., I. J. Wilson, C. A. Hateley, R. Horvath, M. Santibanez-Koref, D. C. Samuels,  
551 D. A. Price, and P. F. Chinnery. 2011. Mitochondrial aging is accelerated by anti-retroviral  
552 therapy through the clonal expansion of mtDNA mutations. *Nat Genet* 43: 806-810.
- 553 41. Feng, J. Y., A. A. Johnson, K. A. Johnson, and K. S. Anderson. 2001. Insights into the  
554 molecular mechanism of mitochondrial toxicity by AIDS drugs. *J Biol Chem* 276: 23832-  
555 23837.
- 556 42. Ding, Y., H. Lin, W. Shen, Q. Wu, M. Gao, and N. He. 2017. Interaction Effects between  
557 HIV and Aging on Selective Neurocognitive Impairment. *J Neuroimmune Pharmacol* 12:  
558 661-669.
- 559 43. Power, C., O. A. Selnes, J. A. Grim, and J. C. McArthur. 1995. HIV Dementia Scale: a rapid  
560 screening test. *J Acquir Immune Defic Syndr Hum Retrovirol* 8: 273-278.
- 561 44. Riedel, D., M. Ghate, M. Nene, R. Paranjape, S. Mehendale, R. Bollinger, N. Sacktor, J.  
562 McArthur, and A. Nath. 2006. Screening for human immunodeficiency virus (HIV)  
563 dementia in an HIV clade C-infected population in India. *J Neurovirol* 12: 34-38.
- 564 45. Lopez, E., A. J. Steiner, K. Smith, N. S. Thaler, D. J. Hardy, A. J. Levine, H. T. Al-Kharafi,  
565 C. Yamakawa, and K. Goodkin. 2017. Diagnostic utility of the HIV dementia scale and the  
566 international HIV dementia scale in screening for HIV-associated neurocognitive disorders  
567 among Spanish-speaking adults. *Appl Neuropsychol Adult* 24: 512-521.
- 568 46. Heaton, R. K., D. B. Clifford, D. R. Franklin, Jr., S. P. Woods, C. Ake, F. Vaida, R. J. Ellis,  
569 S. L. Letendre, T. D. Marcotte, J. H. Atkinson, M. Rivera-Mindt, O. R. Vigil, M. J. Taylor,  
570 A. C. Collier, C. M. Marra, B. B. Gelman, J. C. McArthur, S. Morgello, D. M. Simpson, J.  
571 A. McCutchan, I. Abramson, A. Gamst, C. Fennema-Notestine, T. L. Jernigan, J. Wong, and  
572 I. Grant. 2010. HIV-associated neurocognitive disorders persist in the era of potent  
573 antiretroviral therapy: CHARTER Study. *Neurology* 75: 2087-2096.
- 574 47. Rao, V. R., U. Neogi, E. Eugenin, and V. R. Prasad. 2014. The gp120 protein is a second  
575 determinant of decreased neurovirulence of Indian HIV-1C isolates compared to southern  
576 African HIV-1C isolates. *PLoS One* 9: e107074.
- 577 48. Rao, V. R., U. Neogi, J. S. Talboom, L. Padilla, M. Rahman, C. Fritz-French, S. Gonzalez-  
578 Ramirez, A. Verma, C. Wood, R. M. Ruprecht, U. Ranga, T. Azim, J. Joska, E. Eugenin, A.  
579 Shet, H. Bimonte-Nelson, W. R. Tyor, and V. R. Prasad. 2013. Clade C HIV-1 isolates  
580 circulating in Southern Africa exhibit a greater frequency of dicysteine motif-containing Tat  
581 variants than those in Southeast Asia and cause increased neurovirulence. *Retrovirology* 10:  
582 61.
- 583 49. Ranga, U., R. Shankarappa, N. B. Siddappa, L. Ramakrishna, R. Nagendran, M.  
584 Mahalingam, A. Mahadevan, N. Jayasuryan, P. Satishchandra, S. K. Shankar, and V. R.  
585 Prasad. 2004. Tat protein of human immunodeficiency virus type 1 subtype C strains is a  
586 defective chemokine. *J Virol* 78: 2586-2590.
- 587 50. Ellis, R. J., J. Badiee, F. Vaida, S. Letendre, R. K. Heaton, D. Clifford, A. C. Collier, B.  
588 Gelman, J. McArthur, S. Morgello, J. A. McCutchan, and I. Grant. 2011. CD4 nadir is a  
589 predictor of HIV neurocognitive impairment in the era of combination antiretroviral therapy.  
590 *Aids* 25: 1747-1751.
- 591 51. Massanella, M., R. Fromentin, and N. Chomont. 2016. Residual inflammation and viral  
592 reservoirs: alliance against an HIV cure. *Curr Opin HIV AIDS* 11: 234-241.
- 593 52. Klatt, N. R., N. Chomont, D. C. Douek, and S. G. Deeks. 2013. Immune activation and HIV  
594 persistence: implications for curative approaches to HIV infection. *Immunol Rev* 254: 326-  
595 342.
- 596 53. Garcia-Zepeda, E. A., M. E. Rothenberg, R. T. Ownbey, J. Celestin, P. Leder, and A. D.  
597 Luster. 1996. Human eotaxin is a specific chemoattractant for eosinophil cells and provides  
598 a new mechanism to explain tissue eosinophilia. *Nat Med* 2: 449-456.
- 599 54. Choe, H., M. Farzan, Y. Sun, N. Sullivan, B. Rollins, P. D. Ponath, L. Wu, C. R. Mackay,  
600 G. LaRosa, W. Newman, N. Gerard, C. Gerard, and J. Sodroski. 1996. The beta-chemokine

- 601 receptors CCR3 and CCR5 facilitate infection by primary HIV-1 isolates. *Cell* 85: 1135-  
602 1148.
- 603 55. He, J., Y. Chen, M. Farzan, H. Choe, A. Ohagen, S. Gartner, J. Busciglio, X. Yang, W.  
604 Hofmann, W. Newman, C. R. Mackay, J. Sodroski, and D. Gabuzda. 1997. CCR3 and  
605 CCR5 are co-receptors for HIV-1 infection of microglia. *Nature* 385: 645-649.
- 606 56. Alkhatib, G., E. A. Berger, P. M. Murphy, and J. E. Pease. 1997. Determinants of HIV-1  
607 coreceptor function on CC chemokine receptor 3. Importance of both extracellular and  
608 transmembrane/cytoplasmic regions. *J Biol Chem* 272: 20420-20426.
- 609 57. Lee, A. Y., and H. Korner. 2017. CCR6/CCL20 chemokine axis in human  
610 immunodeficiency virus immunity and pathogenesis. *J Gen Virol* 98: 338-344.
- 611 58. Islam, S., N. Shimizu, S. A. Hoque, A. Jinno-Oue, A. Tanaka, and H. Hoshino. 2013. CCR6  
612 functions as a new coreceptor for limited primary human and simian immunodeficiency  
613 viruses. *PLoS One* 8: e73116.
- 614 59. Islam, S., K. Kanbe, N. Shimizu, T. Ohtsuki, A. Jinno-Oue, A. Tanaka, and H. Hoshino.  
615 2014. CKR-L3, a deletion version CCR6-isoform shows coreceptor-activity for limited  
616 human and simian immunodeficiency viruses. *BMC Infect Dis* 14: 354.
- 617 60. Cameron, P. U., S. Saleh, G. Sallmann, A. Solomon, F. Wightman, V. A. Evans, G.  
618 Boucher, E. K. Haddad, R. P. Sekaly, A. N. Harman, J. L. Anderson, K. L. Jones, J. Mak, A.  
619 L. Cunningham, A. Jaworowski, and S. R. Lewin. 2010. Establishment of HIV-1 latency in  
620 resting CD4+ T cells depends on chemokine-induced changes in the actin cytoskeleton.  
621 *Proc Natl Acad Sci U S A* 107: 16934-16939.
- 622 61. Gosselin, A., P. Monteiro, N. Chomont, F. Diaz-Griffero, E. A. Said, S. Fonseca, V.  
623 Wacleche, M. El-Far, M. R. Boulassel, J. P. Routy, R. P. Sekaly, and P. Ancuta. 2010.  
624 Peripheral blood CCR4+CCR6+ and CXCR3+CCR6+CD4+ T cells are highly permissive to  
625 HIV-1 infection. *J Immunol* 184: 1604-1616.
- 626 62. Ghosh, M., Z. Shen, T. M. Schaefer, J. V. Fahey, P. Gupta, and C. R. Wira. 2009.  
627 CCL20/MIP3alpha is a novel anti-HIV-1 molecule of the human female reproductive tract.  
628 *Am J Reprod Immunol* 62: 60-71.
- 629 63. Vandergeeten, C., R. Fromentin, and N. Chomont. 2012. The role of cytokines in the  
630 establishment, persistence and eradication of the HIV reservoir. *Cytokine Growth Factor*  
631 *Rev* 23: 143-149.
- 632 64. Elahi, S., R. H. Weiss, and S. Merani. 2016. Atorvastatin restricts HIV replication in CD4+  
633 T cells by upregulation of p21. *Aids* 30: 171-183.
- 634

635

636

637

638

639

640

641

642

643



644

645

646

647

648

649

650

651

652

653

654 **Figure Legends:**

655 **Figure 1. Flow diagram of study design and experimental plan:** HIV-1 positive individuals  
656 (n=424) and HIV-1 negative healthy controls (n=295) were screened. Following inclusion and  
657 exclusion criteria, healthy controls (n=43), and HIV positive ART-experienced subjects (n=53)  
658 (grey shed) and ART-naïve HIV-1 positive subjects (n=41) (red shed) were included in the study.  
659 Additional inclusion for ART-experienced subjects are marked in orange. The clinical investigation  
660 including assessment of neurocognitive function by IHDS and laboratory experiments including  
661 evaluation of inflammatory markers, monocyte activation markers, telomere length and HIV-1  
662 reservoir quantification were performed.

663 **Figure 2. Plasma immune activation markers:** Soluble CD14 (a) and CD163 (b) in plasma of the  
664 three groups of individuals were measured using ELISA.

665 **Figure 3. Plasma inflammation markers:** (d) Hierarchical clustering analysis of ANOVA of  
666 significantly differentially expressed proteins with false discovery rate (FDR) <0.001, identified  
667 clustering of 79% (31/39) of Pre-ART samples along with two samples from the HC and one from  
668 the ART group. The ART and HC samples clustered separately from Pre-ART samples but  
669 intermingled with each other. (b) Venn diagram of statistically significant protein level in plasma

670 soluble markers. The sum of the numbers in each large circle represents the total number of  
671 significantly differentially expressed proteins in plasma in the different groups (HC vs. ART, Pre-  
672 ART vs. ART and Pre-ART vs. HC). The overlapping part of the circles represents significantly  
673 different protein among the indicated groups. (c) The eleven soluble proteins that have significantly  
674 different levels of expression between HC and ART groups are shown.

675 **Figure 4. The difference in plasma biomarkers between the different treatment and healthy**  
676 **controls.** CIRCOS plot was created to visualize the different analysis of 25 plasma inflammatory  
677 markers that were significantly different between any of the two comparative groups, i.e. Healthy  
678 control vs. ZDV/3TC/NVP or TDF/3TC/EFV and ZDV/3TC/NVP vs. TDF/3TC/EFV. The outer  
679 circle showed the genes followed by six circles representing proteins associated with different  
680 disease status as indicated by the Olink inflammatory panel. Disease area was selected based on  
681 widely used public-access bioinformatic databases, including UniProt, Human Protein Atlas, Gene  
682 Ontology (GO) and DisGeNET by a custom-built tool at Olink Ab. Cancer (dark orange),  
683 cardiovascular diseases (orange), hepatic disorder (red), inflammatory diseases (maroon),  
684 neurological disorder (dark brown) and renal disorder (golden yellow). Followed by this a bar chart  
685 of NPX values for different proteins in HC (grey), patients on ZDV/3TC/NVP (light yellow) and  
686 those on TDF/3TC/EFV (pink) is presented. The scale was adjusted to +0.2 to -0.2 NPX of higher  
687 and lower NPX value of a particular protein in the three groups. Finally, Venn diagram of  
688 statistically significant protein levels of plasma soluble markers is shown in the centre. The sum of  
689 the numbers in each large circle represents the total number of significantly differentially expressed  
690 proteins in plasma among various combinations (HC vs. ZDV/3TC/NVP, HC vs. TDF/3TC/EFV  
691 and ZDV/3TC/NVP vs. TDF/3TC/EFV). The overlapping part of the circles represents proteins  
692 differently expressed between the groups. The unique proteins are highlighted.

693

694

695

696

697

698

699

700

701

702

703

704

705

706 **Table 1.** Patients' demographic and clinical parameter

707

| Parameter                                                        | Treatment naïve (Pre-ART) | Treatment Experience (ART) | Healthy Control (HC) | P values             |
|------------------------------------------------------------------|---------------------------|----------------------------|----------------------|----------------------|
| N                                                                | 41                        | 53                         | 43                   | ND                   |
| Gender, Female, N (%)                                            | 21 (51)                   | 23(43)                     | 22 (51)              | 0.6734 <sup>#</sup>  |
| At sampling                                                      |                           |                            |                      |                      |
| Age in years, median (IQR)                                       | 40 (37-43)                | 45 (42-49)                 | 46 (40-54)           | <0.0001*             |
| CD4 count (cells/ $\mu$ L); median (IQR)                         | 367 (251-578)             | 667 (476-797)              | NA                   | <0.0001 <sup>§</sup> |
| CD8 count (cells/ $\mu$ L); median (IQR)                         | 1138 (872-1625)           | 772 (337-1092)             | NA                   | <0.0001 <sup>§</sup> |
| CD4:CD8 ratio, median (IQR)                                      | 0.329 (0.1863-0.529)      | 0.76 (0.575-1.013)         | NA                   | <0.0001 <sup>§</sup> |
| Viral Load, Log <sub>10</sub> copies/mL, mean (SD)               | 4.4943 (0.9036)           | <2.14                      | NA                   | <0.0001 <sup>§</sup> |
| Years on treatment, median (IQR)                                 | NA                        | 8 (6-10)                   | NA                   | ND                   |
| Treatment Regimen, n (%)<br>ZDV+3TC+NVP<br>TDF+3TC+EFV           | NA                        | 30 (57%)<br>23 (43%)       | NA                   | ND                   |
| CD4 Count at treatment initiation (cells/ $\mu$ L), median (IQR) | NA                        | 186 (100-280)              | NA                   | ND                   |

708 NA: Not available, ND: Not Done, \*Kruskal-Wallis test, <sup>#</sup> $\chi^2$  test, <sup>§</sup>Mann-Whitney test

709 ZDV: zidovudine, 3TC: lamivudine, NVP: nevirapine, TDF: tenofovir and EFV: efavirenz

710

711

712



713

714

## Cross-Sectional Study

### Screening (2015-2018)

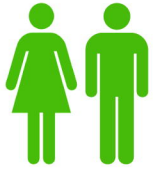

Healthy Control  
(n=295)

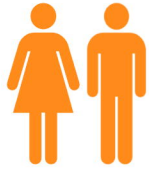

Treatment Experienced  
(n=258)

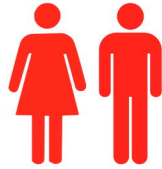

Treatment Naive  
(n=166)

### Inclusion Criteria

**No**

Diabetes, Tuberculosis, Chronic illness, Cardiovascular diseases, anti-inflammatory drugs

**No**

Diabetes, Tuberculosis, illicit Drug use

- First Line treatment
- Duration of ART >5y
- No other medication
- Stable CD4 count
- Viral load <150 c/mL

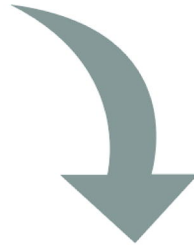

### Study Cohort

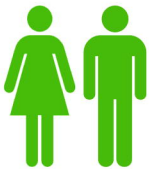

Healthy Control  
(n=43)

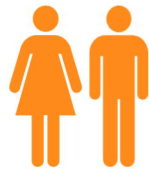

Treatment Experienced  
(n=53)

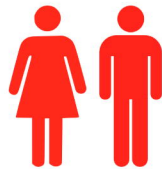

Treatment Naive  
(n=41)

## Clinical Experiments

### International HIV Dementia Scale

Only for healthy controls and treatment experienced group

1. Motor Speed
2. Psychomotor Speed
3. Memory Recall

Sacktor *et al.* AIDS 2005,19:1367-1374

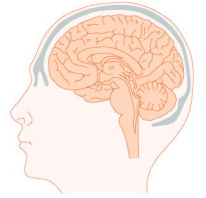

## Laboratory Experiments

### Olink® Inflammation panel

Immuno Reaction    Extention Reaction    Amplification    Detection and Analysis

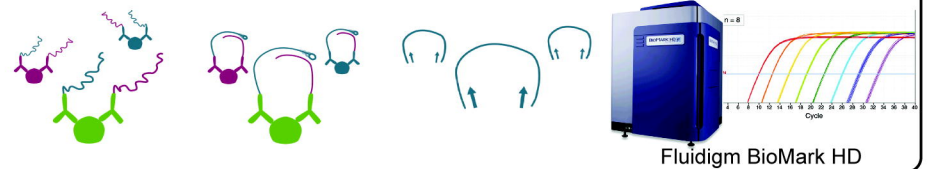

### Monocyte Activation Markers

sCD14 and sCD163

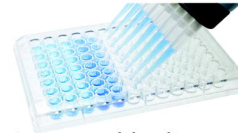

R&D Systems and Invitrogen

### Telomere Length

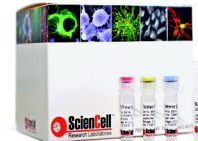

ScienCell™ Research Lab Inc.

### HIV-1 Reservoir Quantification

Only for treatment experienced group  
Internally controlled quantitative PCR (IC-qPCR)

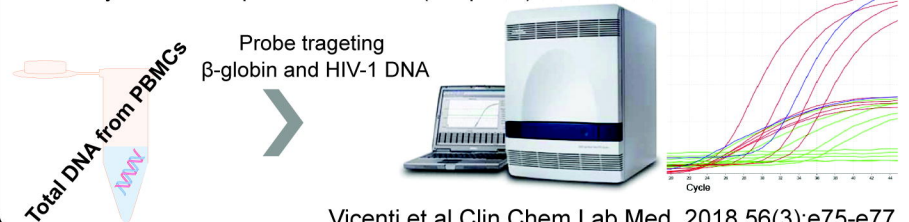

Vicenti *et al* Clin Chem Lab Med. 2018 56(3):e75-e77.

**a.**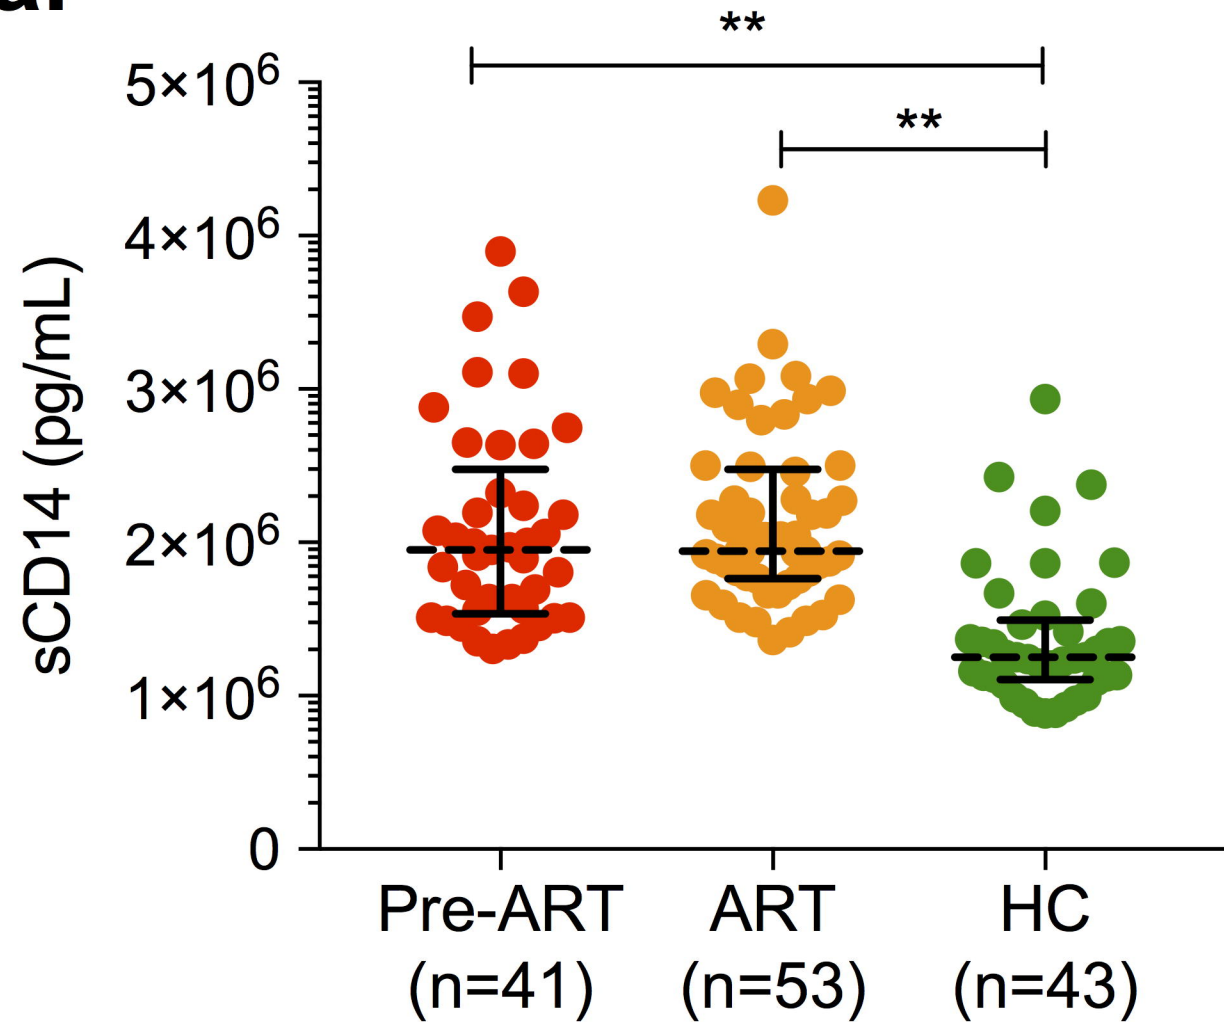**b.**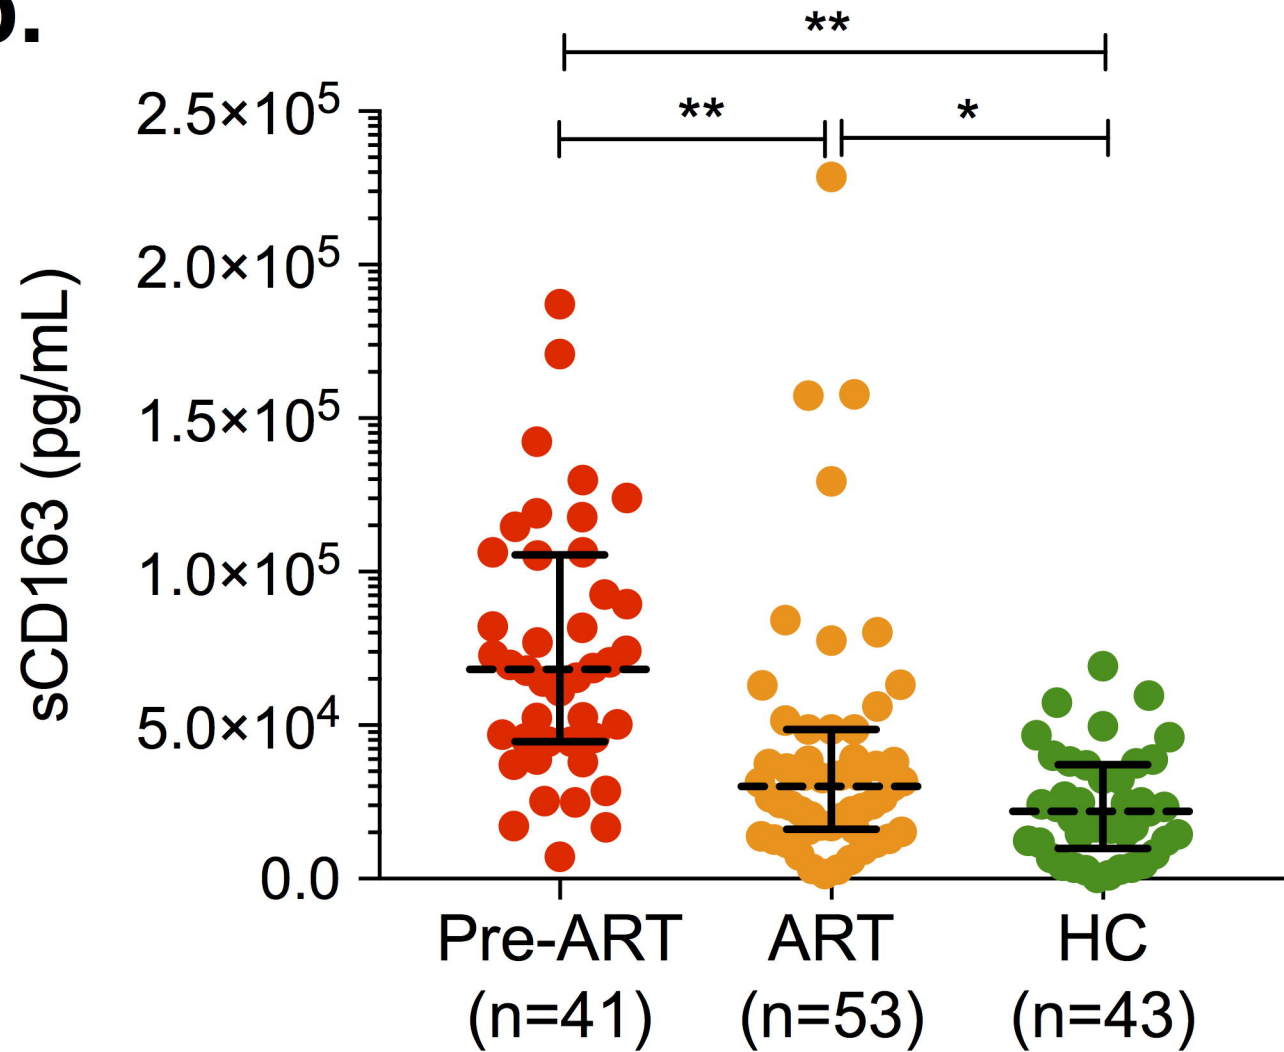

a.

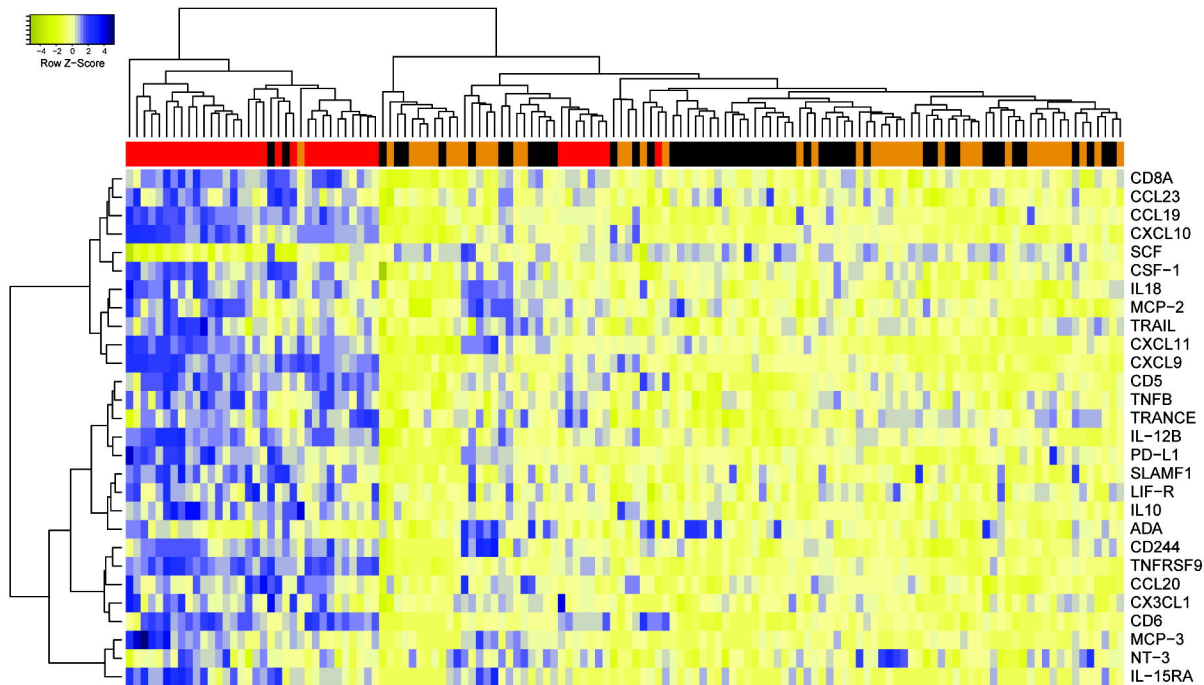

b.

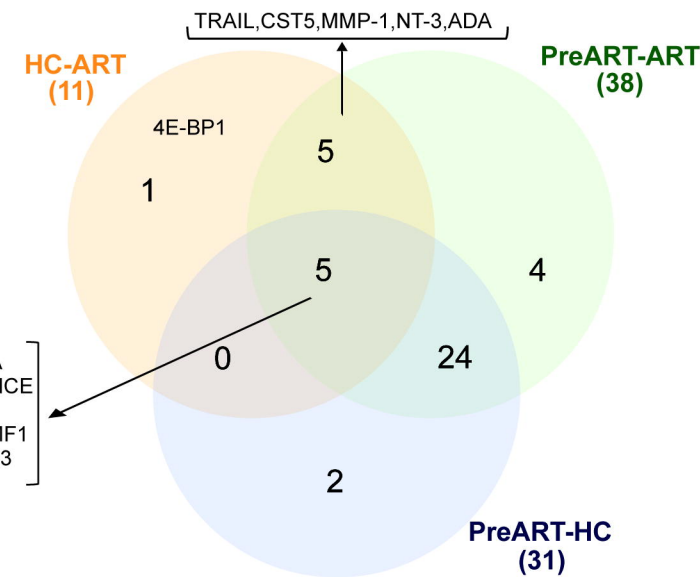

c.

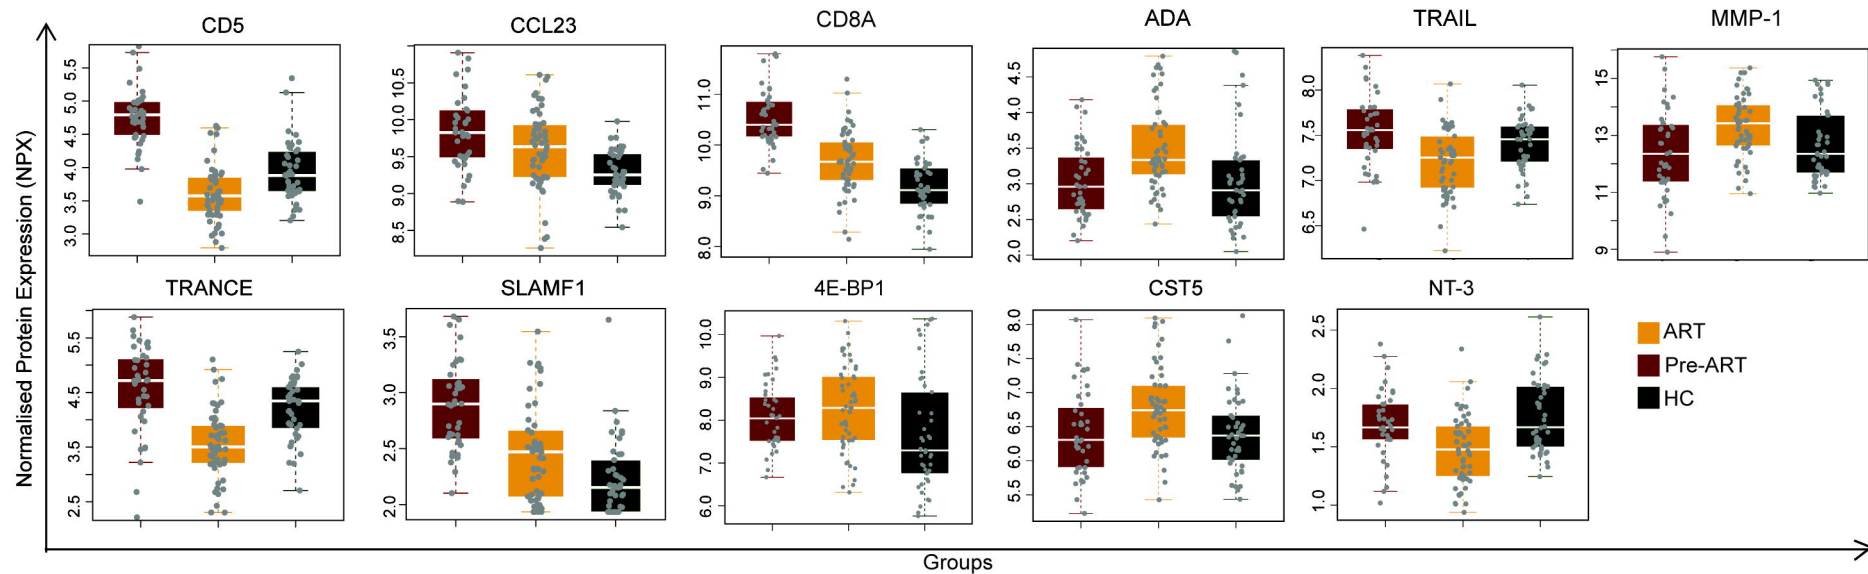



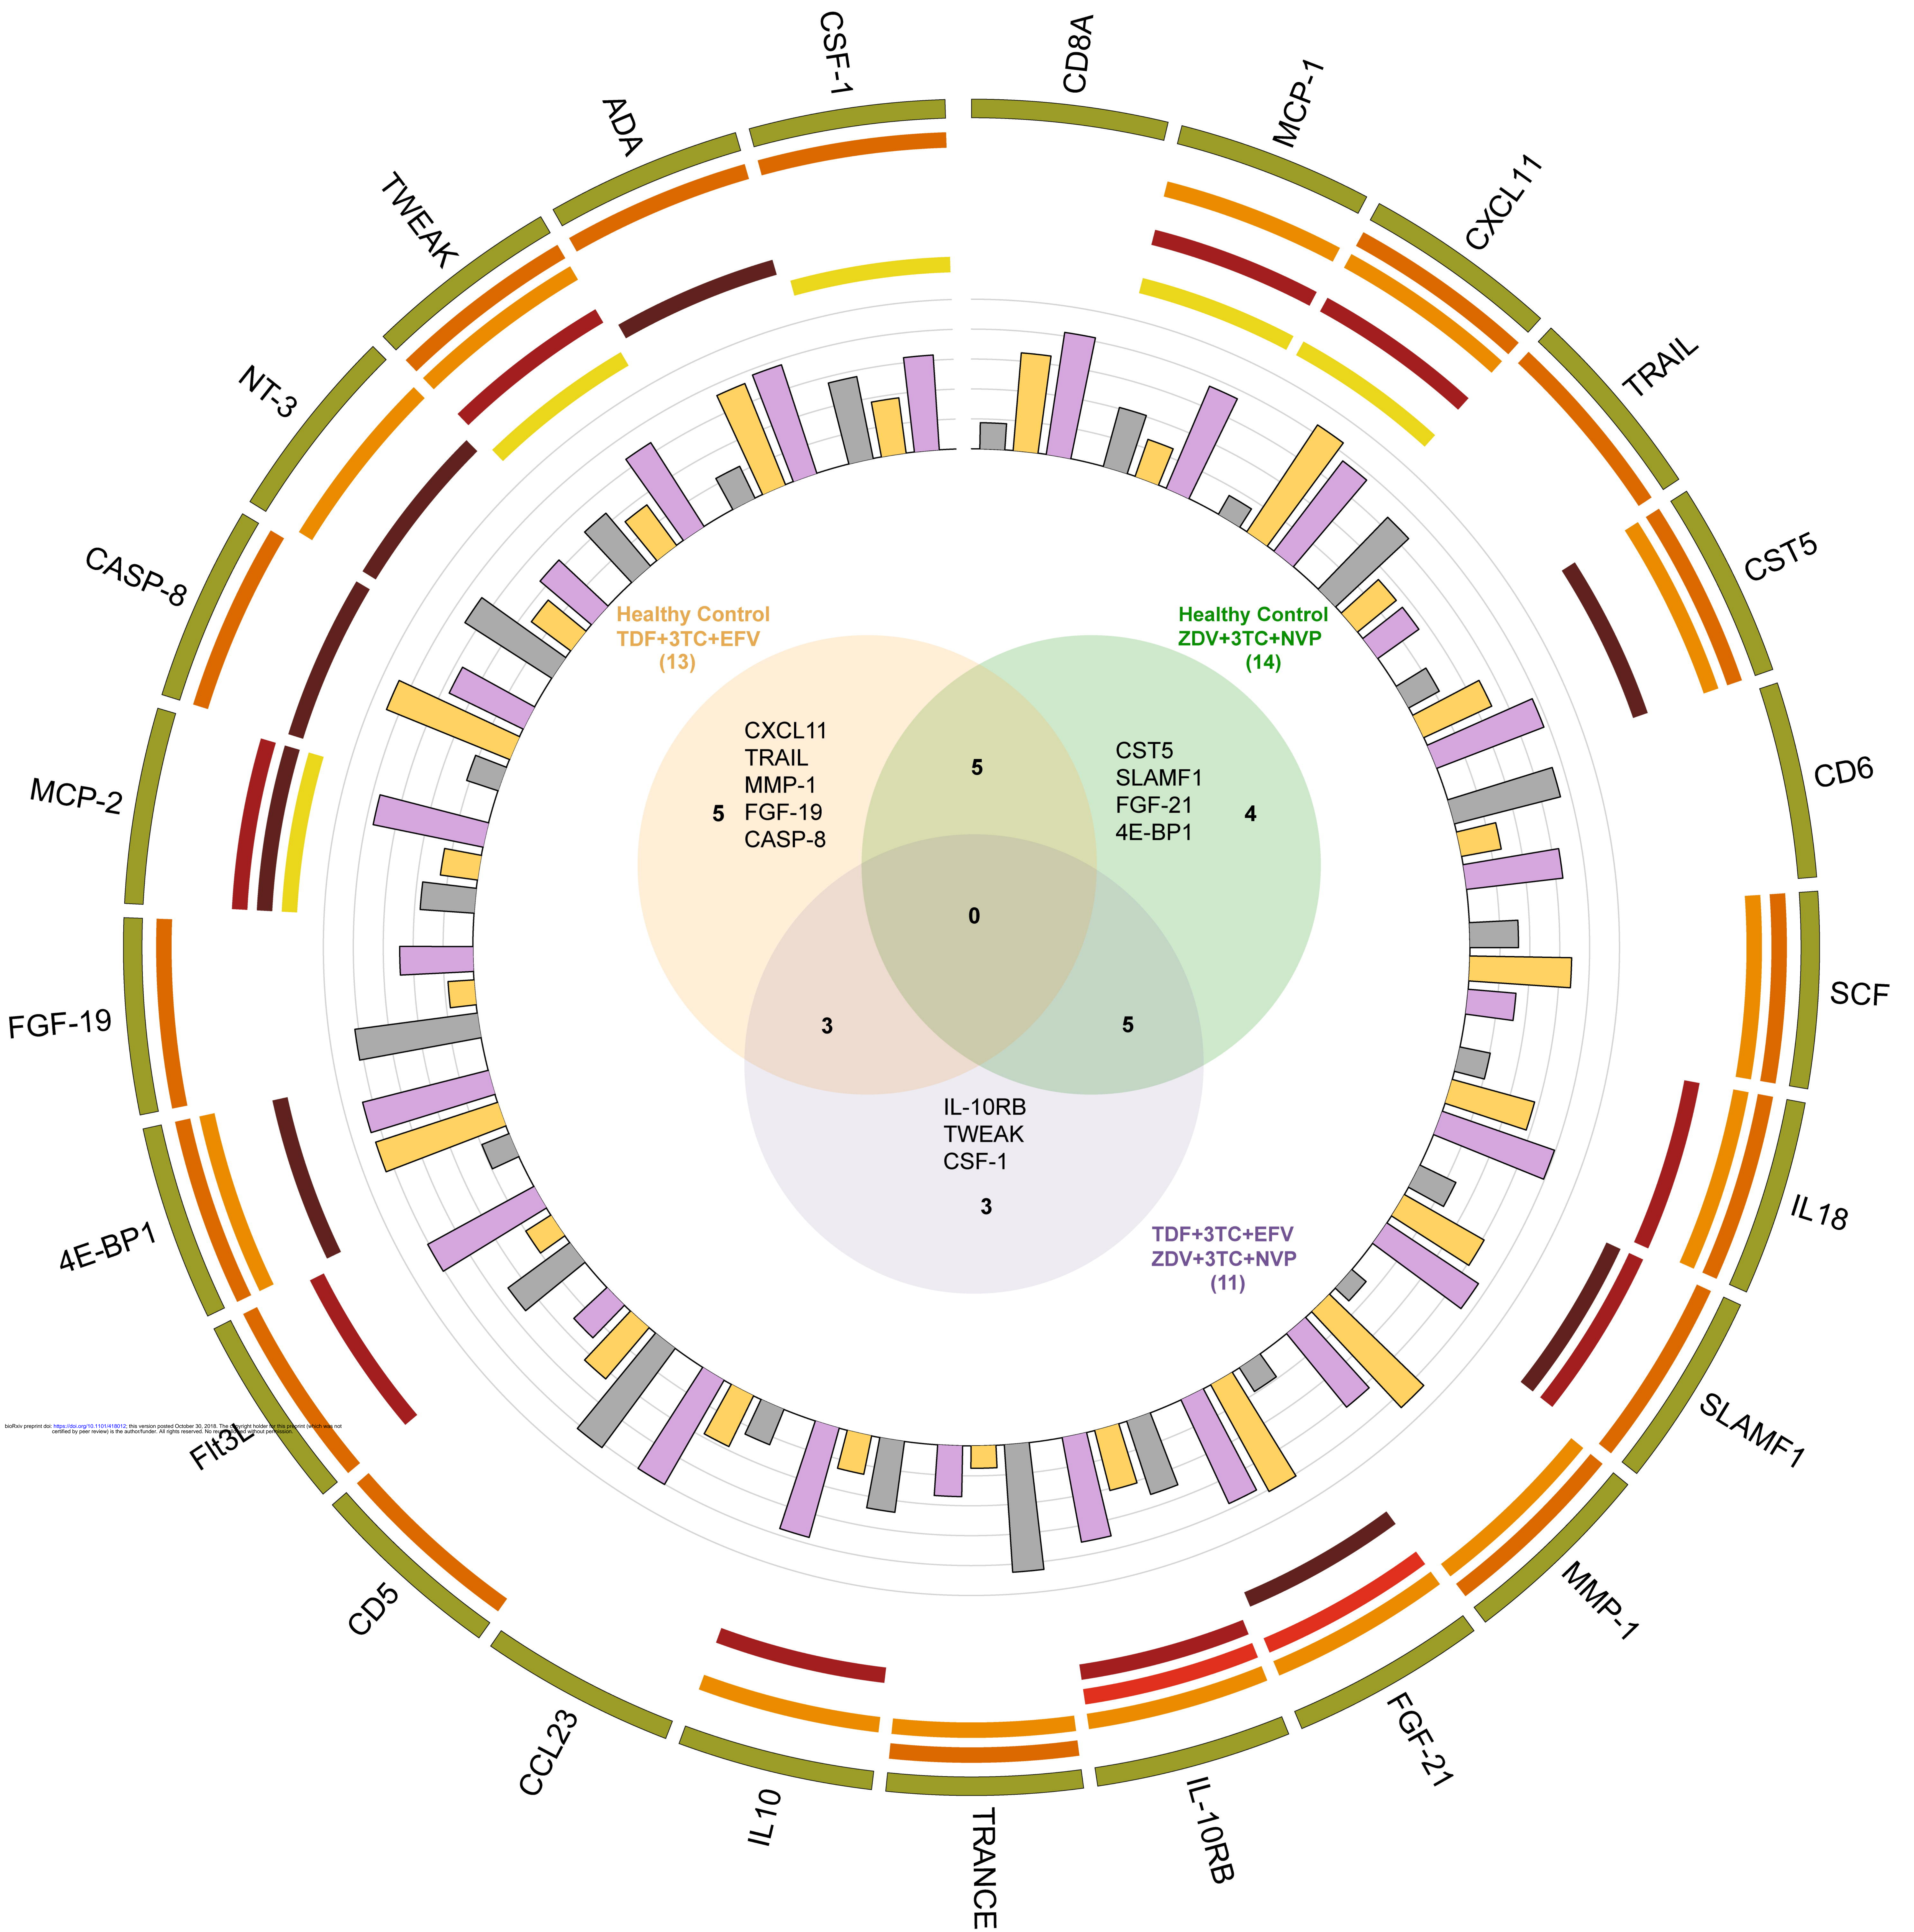

bioRxiv preprint doi: <https://doi.org/10.1101/118012>; this version posted October 30, 2016. The copyright holder for this preprint (which was not certified by peer review) is the author/funder. All rights reserved. No reuse allowed without permission.
